# Supplementary material for: Solution Uptake in Cylindrical Carbon-Fibre-Reinforced Polymer (CFRP) Tendons
Source: Hindawi journal article supplement (doi:10.1155/2022/1981256), 2022-11-30
Supplement: f1 [file 1981256.f1.pdf]

## Experimental details of transverse diffusivity studies

*Paul Scott, Eleni Toumpanaki\* and Janet M. Lees*

Dr. P. Scott

Cambridge Design Partnership, Church Road, Toft, Cambridge, CB23 2RF, UK.  
Email: Paul.Scott@cambridge-design.com

Dr. E. Toumpanaki

University of Bristol, Department of Civil Engineering, University Walk, Bristol, BS8 1TR, UK.

Email: [eleni.toumpanaki@bristol.ac.uk](mailto:eleni.toumpanaki@bristol.ac.uk)

Prof. J.M. Lees

University of Cambridge, Department of Engineering, Civil Engineering Building, JJ Thomson Ave 7a, Cambridge, CB3 0FA, UK

Email: jml2@eng.cam.ac.uk

**Table S1.** Experimental details of transverse diffusivity studies.

| Author                           | $V_f$ | $D_e$<br>(mm <sup>2</sup> /s)      | $t$<br>(mm) | $D_{22}/D_e$ | Temp.<br>(°C) | RH<br>(%) | Satura<br>tion<br>level | Diff.<br>Model |
|----------------------------------|-------|------------------------------------|-------------|--------------|---------------|-----------|-------------------------|----------------|
| Bohlmann & Derby (a) (1977) [37] | 0.630 | <sup>e</sup> 8.00×10 <sup>-7</sup> | 0.72        | 0.180        | 24            | 100       | No *                    | Fickian        |
|                                  | 0.630 | <sup>e</sup> 9.20×10 <sup>-5</sup> | 0.65        | 0.211        | 60            | 100       | No *                    | Fickian        |
|                                  | 0.630 | <sup>e</sup> 7.60×10 <sup>-5</sup> | 0.68        | 0.240        | 82            | 100       | No *                    | Fickian        |
|                                  | 0.630 | No data                            | 0.67        | 0.176        | 60            | 50        | No *                    | Fickian        |
| Bohlmann & Derby (b) (1977) [37] | 0.700 | No data                            | 0.63        | 0.009        | 60            | 100       | No *                    | Fickian        |
| Kondo & Taki (a) (1982) [32]     | 0.600 | 7.01×10 <sup>-7</sup>              | 1           | 0.445        | 75            | 40        | –                       | Fickian        |
|                                  | 0.600 | 7.86×10 <sup>-7</sup>              | 1           | 0.397        | 75            | 65        | –                       | Fickian        |
|                                  | 0.600 | 8.88×10 <sup>-7</sup>              | 1           | 0.464        | 75            | 90        | –                       | Fickian        |
| Kondo & Taki (b) (1982) [32]     | 0.560 | 1.23×10 <sup>-7</sup>              | 1           | 0.315        | 30            | 65        | –                       | Fickian        |
|                                  | 0.560 | 1.29×10 <sup>-7</sup>              | 1           | 0.360        | 30            | 90        | –                       | Fickian        |
|                                  | 0.560 | 1.50×10 <sup>-6</sup>              | 1           | 0.294        | 75            | 40        | –                       | Fickian        |
|                                  | 0.560 | 1.63×10 <sup>-6</sup>              | 1           | 0.387        | 75            | 65        | –                       | Fickian        |
|                                  | 0.560 | 1.58×10 <sup>-6</sup>              | 1           | 0.342        | 75            | 90        | –                       | Fickian        |
|                                  | 0.600 | 7.65×10 <sup>-8</sup>              | –           | 0.139        | 23            | 100       | –                       | Fickian        |

|                        |       |                        |        |       |     |     |                  |                     |
|------------------------|-------|------------------------|--------|-------|-----|-----|------------------|---------------------|
| Delasi &               | 0.600 | $3.10 \times 10^{-7}$  | –      | 0.258 | 49  | 100 | –                | Fickian             |
| Whiteside [39]         | 0.600 | $1.61 \times 10^{-6}$  | –      | 0.190 | 82  | 100 | –                | Fickian             |
| Bond [10]              | 0.610 | $7.42 \times 10^{-7}$  | 0.5, 1 | 0.359 | 50  | 23  | Yes              | <sup>d)</sup> Relax |
|                        | 0.610 | $6.66 \times 10^{-7}$  | 0.5, 1 | 0.360 | 50  | 50  | Yes              | <sup>d)</sup> Relax |
|                        | 0.610 | $5.16 \times 10^{-7}$  | 0.5, 1 | 0.549 | 50  | 75  | Yes              | <sup>d)</sup> Relax |
|                        | 0.610 | $5.31 \times 10^{-7}$  | 0.5, 1 | 0.565 | 50  | 96  | Yes              | <sup>d)</sup> Relax |
|                        | 0.610 | $1.51 \times 10^{-6}$  | 0.5, 1 | 0.361 | 65  | 75  | –                | <sup>d)</sup> Relax |
|                        | 0.610 | $1.36 \times 10^{-6}$  | 0.5, 1 | 0.395 | 65  | 96  | –                | <sup>d)</sup> Relax |
|                        | 0.610 | $2.45 \times 10^{-6}$  | 0.5, 1 | 0.412 | 85  | 43  | No <sup>b)</sup> | <sup>d)</sup> Relax |
|                        | 0.610 | $2.31 \times 10^{-6}$  | 0.5, 1 | 0.462 | 85  | 75  | No <sup>b)</sup> | <sup>d)</sup> Relax |
|                        | 0.610 | $1.94 \times 10^{-6}$  | 0.5, 1 | 0.479 | 85  | 94  | No <sup>b)</sup> | <sup>d)</sup> Relax |
| Adams & Singh<br>[22]  | 0.53  | $2.15 \times 10^{-6}$  | 2, 1.2 | 0.540 | 100 | 100 | No               | Fickian             |
| Hong et al. [39]       | 0.665 | $6.26 \times 10^{-7}$  | 1.4    | 0.038 | 23  | DW  |                  | Relax               |
|                        | 0.665 | $24.17 \times 10^{-7}$ | 1.4    | 0.022 | 40  |     |                  |                     |
|                        | 0.665 | $61.14 \times 10^{-7}$ | 1.4    | 0.025 | 60  |     |                  |                     |
| Wang et al. [24]       | 0.50  | $8.69 \times 10^{-6}$  | 2.0    | 0.067 | 60  | DW  | Yes              | Fickian             |
|                        | 0.50  | $8.69 \times 10^{-6}$  | 2.0    | 0.163 | 60  |     |                  |                     |
|                        | 0.50  | $3.68 \times 10^{-6}$  | 2.0    | 0.043 | 60  |     |                  |                     |
|                        | 0.50  | $3.68 \times 10^{-6}$  | 2.0    | 0.102 | 60  |     |                  |                     |
| Arnold et al. [40]     | 0.58  | $11.91 \times 10^{-8}$ | 1,2,4  | 0.372 | 23  | W   | Yes              | Fickian             |
|                        | 0.58  | $31.2 \times 10^{-8}$  | 1,2,4  | 0.401 | 40  | W   |                  |                     |
|                        | 0.58  | $143.2 \times 10^{-8}$ | 1,2,4  | 0.482 | 70  | W   |                  |                     |
|                        | 0.58  | $155.5 \times 10^{-8}$ | 1,2,4  | 0.418 | 70  | 85  |                  |                     |
|                        | 0.58  | $175.5 \times 10^{-8}$ | 1,2,4  | 0.361 | 70  | 60  |                  |                     |
|                        | 0.58  | $11.91 \times 10^{-8}$ | 1,2,4  | 0.144 | 23  | W   |                  |                     |
|                        | 0.58  | $31.2 \times 10^{-8}$  | 1,2,4  | 0.124 | 40  | W   |                  |                     |
|                        | 0.58  | $143.2 \times 10^{-8}$ | 1,2,4  | 0.151 | 70  | W   |                  |                     |
|                        | 0.58  | $155.5 \times 10^{-8}$ | 1,2,4  | 0.135 | 70  | 85  |                  |                     |
|                        | 0.58  | $175.5 \times 10^{-8}$ | 1,2,4  | 0.110 | 70  | 60  |                  |                     |
| Shen & Springer<br>[9] | 0.680 | $18.00 \times 10^{-4}$ | 1.27   | 0.068 | 121 | 100 | No <sup>a)</sup> | Fickian             |
|                        | 0.680 | $15.00 \times 10^{-5}$ | 1.27   | 0.072 | 93  | –   | No <sup>a)</sup> | Fickian             |
|                        | 0.680 | $18.50 \times 10^{-5}$ | 1.27   | 0.078 | 71  | –   | No <sup>a)</sup> | Fickian             |
|                        | 0.680 | $12.00 \times 10^{-6}$ | 1.27   | 0.070 | 49  | –   | No <sup>a)</sup> | Fickian             |
|                        | 0.680 | $17.50 \times 10^{-6}$ | 1.27   | 0.064 | 27  | –   | No <sup>a)</sup> | Fickian             |

<sup>a)</sup> Understanding based on sample presented from the dataset

<sup>b)</sup> Though saturation is not observed, it is estimated through use of regression analysis

– No data, W=Water and DW=Distilled water

<sup>c)</sup> obtained from figure so there may be a loss of accuracy <sup>d)</sup> Fickian parameters also calculated
